# Supplementary material
Source: publisher figshare collection journal article supplement (https://acs.figshare.com/ndownloader/files/3716068)
Supplement: Supplementary file 1 [file 3716068]

# Supporting Information:

  

## Spatially Localized Chemical Patterns Around an $A+B \rightarrow$ oscillator Front

1  
Marcello A. Budroni,<sup>\*,†</sup> Lorena Lemaigre,<sup>‡,§</sup> Dario Escala,<sup>¶</sup> A.  
Perez-Muñuzuri,<sup>¶</sup> and Anne De Wit<sup>‡</sup>

*Department of Chemistry and Pharmacy, University of Sassari, Sassari, Italy, Université libre de  
Bruxelles (ULB), Nonlinear Physical Chemistry Unit, Faculté des Sciences, CP231, 1050  
Brussels, Belgium., and Nonlinear Physics Group, University of Santiago de Compostela, 15782  
Santiago de Compostela, Spain*

E-mail: mabudroni@uniss.it

---

\*To whom correspondence should be addressed

<sup>†</sup>University of Sassari

<sup>‡</sup>ULB

<sup>¶</sup>University of Santiago

<sup>§</sup>M.A. Budroni and L. Lemaigre contributed equally to this work

## 2 Kinetic Model

3 The Oregonator model can be derived from the FKN mechanism<sup>1</sup> by considering the following set  
4 of kinetic steps:<sup>2</sup>

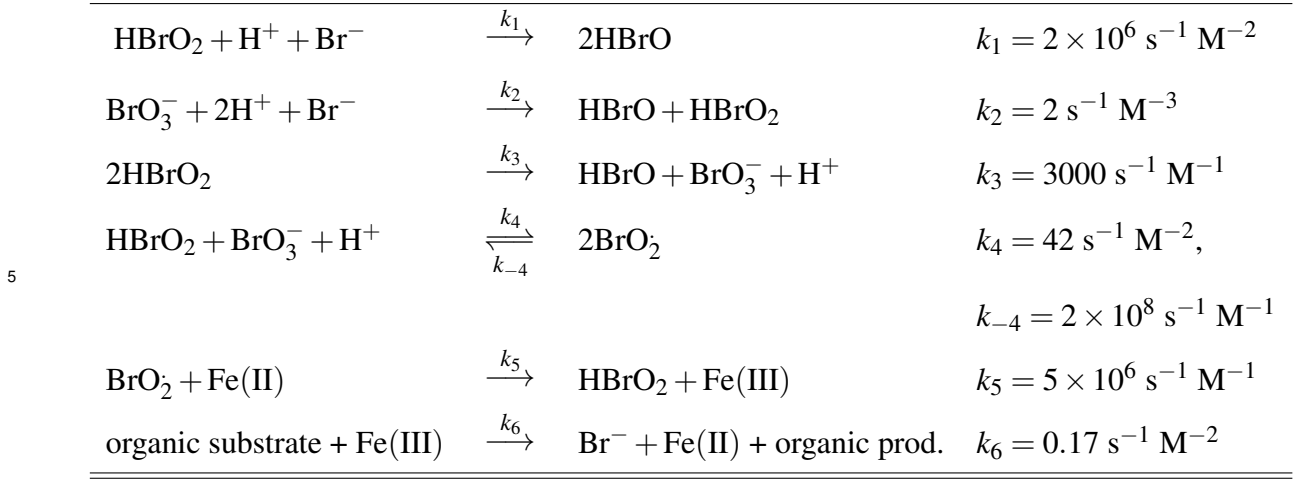

6  
7 The first five steps describe the “oxidation phase” (OP) while the last step simplifies “resetting  
8 of the chemical clock”. If, following the traditional notation, we set  $H = [\text{H}^+]$ ,  $A = [\text{BrO}_3^-]$ ,  
9  $B =$  organic substrate,  $X = [\text{HBrO}_2]$ ,  $Y = [\text{Br}^-]$ ,  $Z = [\text{Fe(III)}]$ ,  $P = [\text{HBrO}]$ ,  $W = [\text{BrO}_2]$  and  
10  $C = [\text{Fe(II)}]$ , the corresponding kinetic equations read

$$\frac{dX}{dt} = -k_1 HXY + k_2 AH^2Y - 2k_3 X^2 - k_4 AHX + k_{-4} W^2 + k_5 WC \quad (1)$$

$$\frac{dY}{dt} = -k_1 HXY - k_2 AH^2Y + k_6 BZ \quad (2)$$

$$\frac{dZ}{dt} = k_5 WC - k_6 BZ \quad (3)$$

$$\frac{dW}{dt} = 2k_4 AHX - 2k_{-4} W^2 - k_5 WC \quad (4)$$

$$\frac{dC}{dt} = -k_5 WC + k_6 BZ. \quad (5)$$

11 Applying the steady-state approximation,  $dW/dt = 0$ ,<sup>3</sup> allows us to eliminate eq. (4) and substi-  
12 tute the term  $k_5 WC$  with  $2k_4 AHX$  (since  $k_5 CW = 2k_4 AHX - 2k_{-4} W^2$  and  $k_5 C \gg 2k_{-4} W$  at almost

13 all the times during the reaction). The autocatalytic term also needs to be modified in order to en-  
 14 sure the conservation of the global amount of the catalyst and to avoid an unlimited depletion of its  
 15 reduced form which may cause divergent solutions to the kinetic equations. A typical correction to  
 16 this term is  $k_4AHXC/(C + c_{min})$  (see<sup>3</sup> and references therein), where  $c_{min}$  is a small constant. By  
 17 replacing  $C = C_0 - Z$  (where  $C_0$  is the initial concentration of the catalyst), the previous correction  
 18 takes the form  $k_4AHX(C_0 - Z)/(C_0 - Z + c_{min})$ .

19

20 The final kinetic model is

$$\frac{dX}{dt} = -k_1HXY + k_2AH^2Y - 2k_3X^2 + k_4AHX(C_0 - Z)/(C_0 - Z + c_{min}) \quad (6)$$

$$\frac{dY}{dt} = -k_1HXY - k_2AH^2Y + k_6BZ \quad (7)$$

$$\frac{dZ}{dt} = 2k_4AHX(C_0 - Z)/(C_0 - Z + c_{min}) - k_6BZ. \quad (8)$$

21 Starting from this system, we can reduce the global process to OP by neglecting the term  $k_6BZ$ .

22 The dimensionless form of the OP kinetic equations is written by introducing the following time

23 and concentrations scales  $\{t_0 = 1/(k_2A_0H_0^2), X_0 = k_4A_0H_0/2k_3, Y_0 = k_4A_0/k_1, Z_0 = k_4^2A_0/(k_2k_3)\}$ :

$$\frac{dx}{d\tau} = \frac{1}{\varepsilon_1}(-hxy + qah^2y - x^2 + (1 - z/z_m)/(1 - z/z_m + \varepsilon)ahx) \quad (9)$$

$$\frac{dy}{d\tau} = -\frac{1}{q}hxy - ah^2y \quad (10)$$

$$\frac{dz}{d\tau} = (1 - z/z_m)/(1 - z/z_m + \varepsilon)ahx \quad (11)$$

24 where  $q = 2k_2k_3/(k_1k_4)$ ,  $\varepsilon_1 = k_2H_0/k_4$ ,  $\varepsilon = c_{min}/C_0$ ,  $z_m = Z_0/C_0$  and  $A_0, H_0$  are the dimen-

25 sional initial concentration of the bromate and the sulfuric acid, respectively, and define the con-

26 centration scales for  $A$  and  $H$ .

27

28 The dimensionless model to describe the bulk behavior of the full BZ system including the resetting  
 29 step is obtained by using the initial concentration of the organic substrate  $B_0$  to define the time scale  
 30  $t_0 = 1/(k_6 B_0)$  and the following concentration scales for the chemical species  $\{X_0 = k_4 A_0 H_0 / 2k_3,$   
 31  $Y_0 = k_4 A_0 / k_1, Z_0 = (k_4 A_0 H_0)^2 / k_3 k_6 B_0\}$

$$\frac{dx}{d\tau} = \frac{1}{\varepsilon_1} (-hxy + qah^2y - x^2 + (1 - z/z_m)/(1 - z/z_m + \varepsilon)ahx) \quad (12)$$

$$\frac{dy}{d\tau} = \frac{1}{\varepsilon_2} (-hxy - qah^2y + bz) \quad (13)$$

$$\frac{dz}{d\tau} = (1 - z/z_m)/(1 - z/z_m + \varepsilon)ahx - bz. \quad (14)$$

32 Note that the full BZ model presents a different definition of the parameter  $\varepsilon_1$  with respect to  
 33 the OP kinetics and also includes  $\varepsilon_2$ . In both models the parameter  $q$  is the same ratio of kinetic  
 34 constants independent of chemical concentrations. Varying the value of  $q$  allows one to tune the  
 35 shape, the amplitude and the frequency of the chemical oscillations by affecting the topology of the  
 36 related limit cycle in the phase portrait. The best room-temperature estimate for parameters  $q$  from  
 37 the rate constants of the FKN model is around 0.00015 (uncertainty of perhaps 50%). However,  
 38 in the literature<sup>4,5</sup> this parameter is typically ranged between 0.0001 and 0.01. Parameter  $q$  can  
 39 also control the transition from the oscillatory to the excitable regime as can be observed in Fig.1,  
 40 where the oscillation period is characterized as a function of  $B_0$  for  $q = 0.0001$  and 0.01.  
 41 The increment of  $q$ , at  $B_0$  fixed, produces a decrease of the oscillation period. A decrease of the  
 42 oscillation period is also registered by decreasing  $B_0$  with  $q$  fixed. Note that when  $q = 0.01$  the  
 43 system switches from the oscillatory to the excitable regime if  $B_0 \leq 0.3$  M.

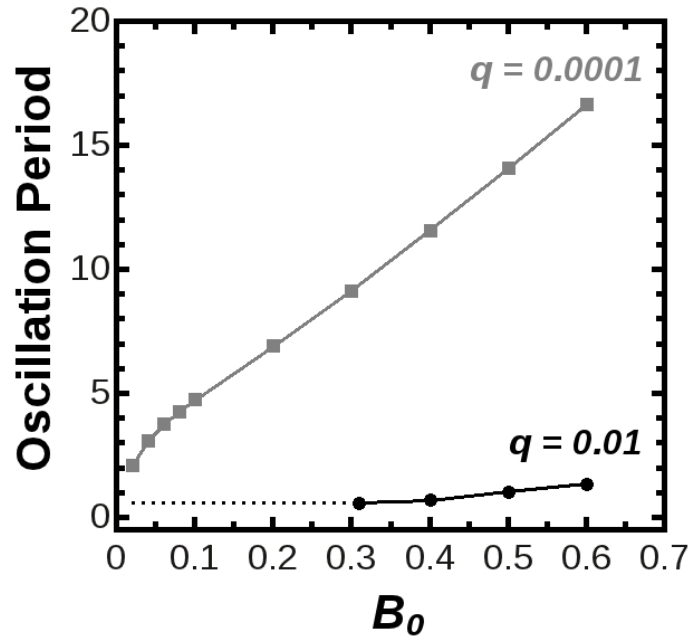

Figure 1: Dependence of the bulk oscillation period upon  $q$  and  $B_0$ . The dotted line represents the domain of  $B_0$  where the system is excitable when  $q = 0.01$ .

#### 44 **References**

- 45 (1) Field, R. J.; Korös, E.; Noyes, R.M. Oscillations in chemical systems. II. Thorough analysis of  
 46 temporal oscillation in the bromate-cerium-malonic acid system. *J. Am. Chem. Soc.* 1972, *94*,  
 47 8649–8664.
- 48 (2) Gray, P.; Scott, S.K. Chemical oscillations and instabilities. Non-linear chemical kinetics; Ox-  
 49 ford University Press: Oxford, UK, 1994.
- 50 (3) Vanag, V.K.; Epstein, I.R. A model for jumping and bubble waves in the  
 51 BelousovZhabotinsky-aerosol OT system. *J. Chem. Phys.* 2009, *131*, 104512.
- 52 (4) Budroni, M.A.; Masia, M.; Rustici, M.; Marchettini, N.; Volpert, V. Bifurcations in spiral tip  
 53 dynamics induced by natural convection in the Belousov-Zhabotinsky reaction. *J. Chem. Phys.*  
 54 2009, *130*, 024902.
- 55 (5) Jahnke, W.; Skaggs, W.E.; Winfree, A.T. Chemical vortex dynamics in the Belousov-

56 Zhabotinsky reaction and in the two-variable Oregonator model. *J. Phys. Chem.* 1989,93, 740-  
57 749.
